# Supplementary material for: In situ surface hydrogenation synthesis of Ti3+ self-doped TiO2 with enhanced visible light photoactivity
Source: Royal Society of Chemistry journal article supplement (doi:10.1039/c4nr00972j), 2014-01-01
Supplement: c4nr00972j1.pdf [file c4nr00972j1.pdf]

## Supporting information

# In situ surface hydrogenation synthesis of Ti<sup>3+</sup> self-doped TiO<sub>2</sub> with enhanced visible light photoactivity

*Junchao Huo, Yanjie Hu\*, Hao Jiang and Chunzhong Li\**

Key Laboratory for Ultrafine Materials of Ministry of Education, School of Materials  
Science and Engineering, East China University of Science & Technology, Shanghai  
200237, China

Corresponding authors: [czli@ecust.edu.cn](mailto:czli@ecust.edu.cn) (C. Z. Li) and [huyanjie@ecust.edu.cn](mailto:huyanjie@ecust.edu.cn) (Y. J.  
Hu)

Fax: +86 21 64250624. Tel: 86- 21- 6425- 0949.

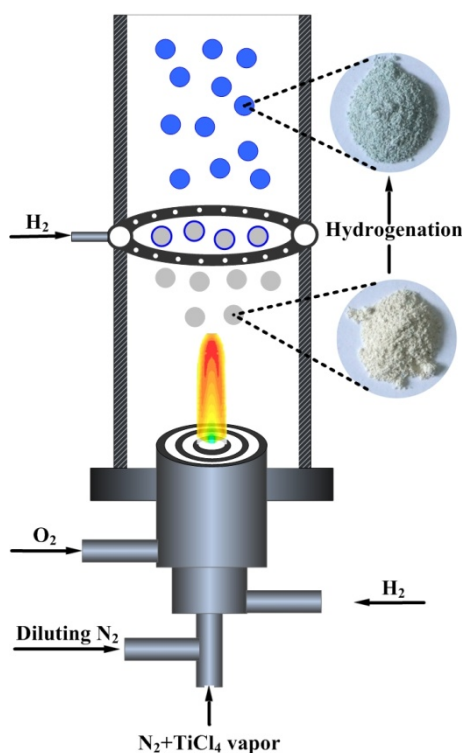

**Fig. S1.** Schematic setup for  $\text{Ti}^{3+}$  self-doped  $\text{TiO}_2$  nanoparticles

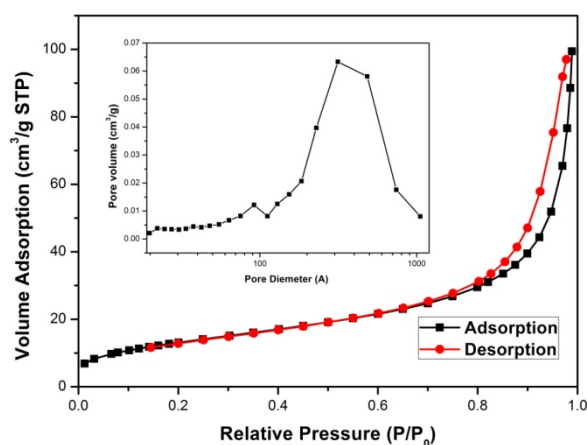

**Fig. S2.** Nitrogen adsorption-desorption isotherms and corresponding pore size distribution of  $\text{Ti}^{3+}$  self-doped  $\text{TiO}_2$

Fig. S2 shows the nitrogen adsorption-desorption isotherms of the  $\text{Ti}^{3+}$  self-doped  $\text{TiO}_2$  together with the BJH analysis of desorption isotherms in the inset. The isotherm is of type IV (BDDT classification) with a hysteresis loop, which is typical for mesoporous materials. Herein, the presence of mesopores is most likely the result

of the aggregation of primary nanoparticles. The BET surface area of the sample is 42.3 m<sup>2</sup>/g, and the total pore volume is 0.118 cm<sup>3</sup>/g.

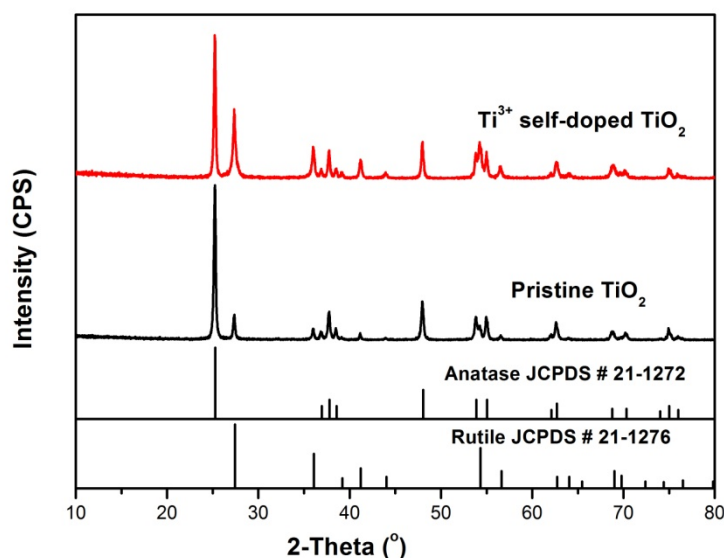

**Fig. S3.** XRD patterns of pristine TiO<sub>2</sub> and Ti<sup>3+</sup> self-doped TiO<sub>2</sub>

Fig. S3 shows the XRD patterns of TiO<sub>2</sub> without hydrogenation and Ti<sup>3+</sup> self-doped TiO<sub>2</sub> nanoparticles, suggesting that the samples have good crystalline nature. All diffraction peaks can be indexed to the anatase TiO<sub>2</sub> (JCPDS No. 21-1272) and rutile TiO<sub>2</sub> (JCPDS No. 21-1276), respecting the samples are both mixture of anatase TiO<sub>2</sub> and rutile TiO<sub>2</sub>. However, the anatase fraction of Ti<sup>3+</sup> self-doped TiO<sub>2</sub> nanoparticles (68.7%) is lower than that of TiO<sub>2</sub> without hydrogenation (91.2%). This is because of the introducing of hydrogen increases the reaction temperature above the flame, accelerates the transformation of anatase TiO<sub>2</sub> to rutile TiO<sub>2</sub>. The disordered layer observed in the HRTEM image near the surface is not relevant to the increase of rutile phase<sup>1-3</sup>. The average crystallite sizes of Ti<sup>3+</sup> self-doped TiO<sub>2</sub> nanoparticles are calculated from the anatase (101) and rutile (110) with the Scherrer equation, and are found to be 5.0 nm and 7.8 nm, respectively.

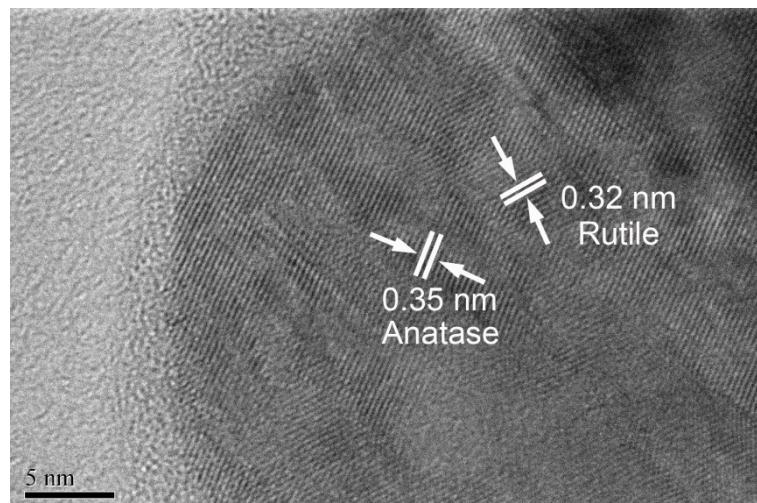

**Fig. S4** HRTEM image of  $\text{Ti}^{3+}$  self-doped  $\text{TiO}_2$  with mixture phase

The HRTEM image of  $\text{Ti}^{3+}$  self-doped  $\text{TiO}_2$  with mixture phase is shown in Fig. S4. The mixture of different crystal lattice can be clearly observed, indicating the sample is mixture of anatase  $\text{TiO}_2$  and rutile  $\text{TiO}_2$ , in agreement with XRD patterns.

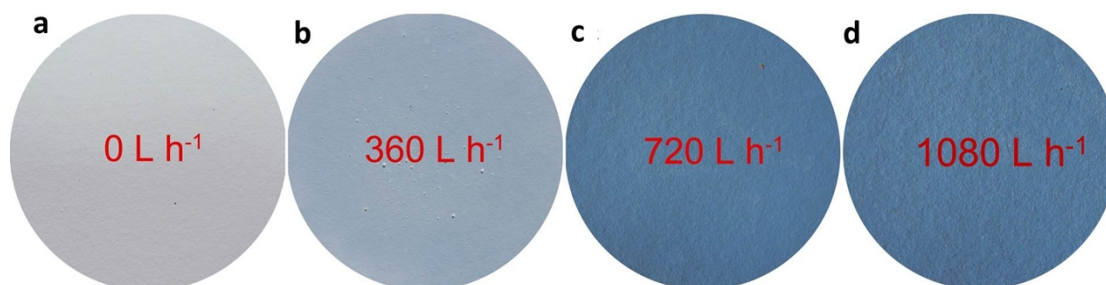

**Fig. S5** The different color of  $\text{Ti}^{3+}$  self-doped  $\text{TiO}_2$  with different flow rate of hydrogen, (a)  $0 \text{ L h}^{-1}$ , (b)  $360 \text{ L h}^{-1}$ , (c)  $720 \text{ L h}^{-1}$ , (d)  $1080 \text{ L h}^{-1}$

The color can be changed by using different amount of  $\text{H}_2$  for hydrogenation (Fig. S5). White products were obtained when none hydrogenation  $\text{H}_2$  was used. Light blue and dark blue products can be prepared if  $360 \text{ L h}^{-1}$  and  $720 \text{ L h}^{-1}$  hydrogenation  $\text{H}_2$  was used, respectively. Obviously, when the total flow rate hydrogenation  $\text{H}_2$  was lower than  $720 \text{ L h}^{-1}$ , the blue color was much darker as more hydrogenation  $\text{H}_2$  was

used. However, when the total flow rate hydrogenation  $H_2$  was higher than  $720\text{ L h}^{-1}$ , as shown in fig S3d, the blue color almost did not changed when more hydrogenation  $H_2$  was used. This is because while excessive  $H_2$  was used, the amount of  $H_2$  was not the main element influencing the degree of hydrogenation. Therefore the concentration of  $Ti^{3+}$  can be modified by the flow rate of hydrogenation  $H_2$ .

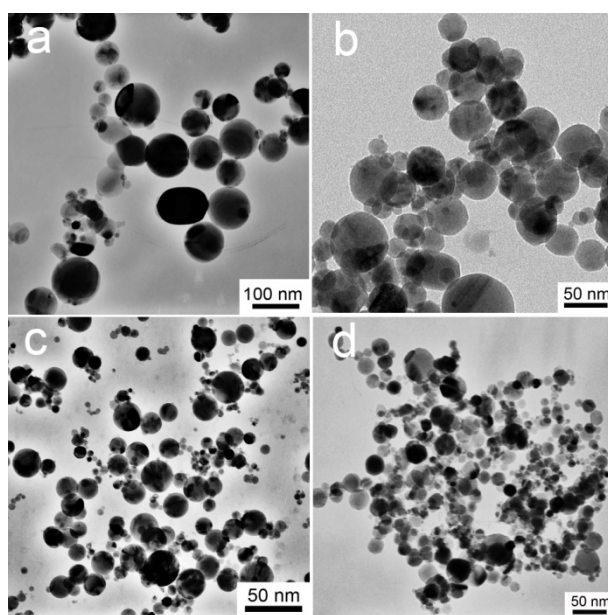

**Fig. S6.** pore size distribution of  $Ti^{3+}$  self-doped  $TiO_2$  with different flow rate of carrier gas. (a)  $80\text{ L h}^{-1}$ , (b)  $40\text{ L h}^{-1}$ , (c)  $20\text{ L h}^{-1}$ , (d)  $10\text{ L h}^{-1}$ .

The morphology of obtained samples is found depended on some experimental parameters, the concentration of  $TiCl_4$  is the most important parameter. Fig. S6 shows TEM images of samples obtained at different  $TiCl_4$  concentration while keeping all of the other conditions constant. The diameter can be decreased by reducing the  $TiCl_4$  concentration. When different flow rate ( $80\text{ L/h}$ ,  $40\text{ L/h}$ ,  $20\text{ L/h}$ ,  $10\text{ L/h}$ ) of carrier gas of  $N_2$  was used,  $TiO_2$  nanoparticles with average diameter of  $70\text{ nm}$ ,  $40\text{ nm}$ ,  $20\text{ nm}$  and  $15\text{ nm}$  were formed, respectively. However, the obtained  $TiO_2$  using  $10\text{ L/h}$  of

carrier gas was more uniform, take into the consideration of production rate, 40 L/h of carrier gas was used in our experiment.

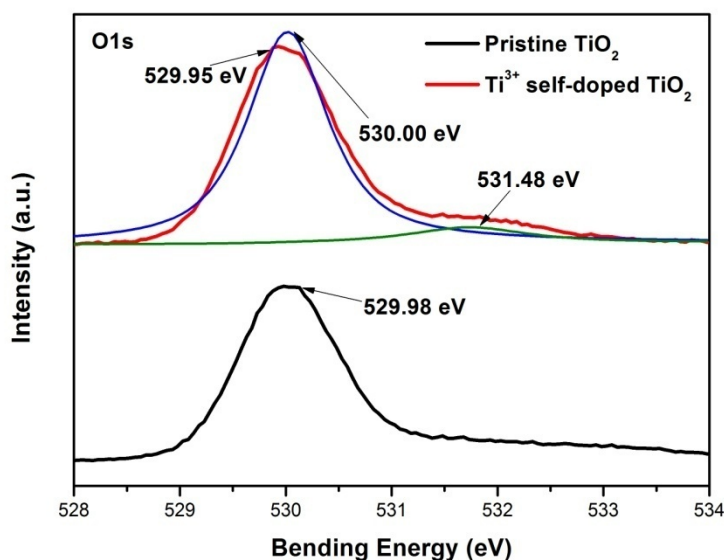

**Fig. S7.** High resolution XPS spectrum of O<sub>1s</sub> Ti<sup>3+</sup> self-doped TiO<sub>2</sub> and pristine TiO<sub>2</sub> without hydrogenation

The O 1s XPS spectra are shown Fig. S7, the signal centered at 529.98 eV and 531.48 eV are the typical signals of Ti–O–Ti and surface OH species, respectively. The O 1s spectra illustrate that Ti<sup>3+</sup> self-doped TiO<sub>2</sub> has much more surface OH species.

The photodegradation of MB in aqueous solutions using Ti<sup>3+</sup> self-doped TiO<sub>2</sub>, pristine TiO<sub>2</sub> and P25 as photocatalysts with irradiation of ultraviolet light is shown in Fig. S8. The pristine TiO<sub>2</sub> exhibits the best photoactivity under ultraviolet light. The Ti<sup>3+</sup> self-doped TiO<sub>2</sub> sample exhibits the lowest photoactivity under ultraviolet light. The introduction of H<sub>2</sub> enhanced the temperature of reaction room, accelerated the transformation of anatase TiO<sub>2</sub> to rutile TiO<sub>2</sub>. The anatase fraction of Ti<sup>3+</sup> self-doped



**Fig. S9** UV–vis spectrum of MB aqueous solutions in different times by using  $\text{Ti}^{3+}$  self-doped  $\text{TiO}_2$  as photocatalysts under visible light irradiation

1. D. A. H. Dorian, C. C. Sorrell, *J Mater. Sci.*, 2011, **46**, 855.
2. B. F. Xin, H. Wang, J. Wu, R. H. Zhao, Y. F. Lu, B. F. Xin, *Appl. Surf. Sci.*, 2014, **294**, 36.
3. K. Sabyrov, V. Adamson, L. Penn, *CrystEngComm*, 2014, **16**, 1488.
